# Supplementary material for: Genetic subtypes of smoldering multiple myeloma are associated with distinct pathogenic phenotypes and clinical outcomes
Source: PubMed Central journal article supplement (PMC9200804; doi:10.1038/s41467-022-30694-w), 2022-06-15

## **Supplementary Information:**

Genetic Subtypes of Smoldering Multiple Myeloma are associated with Distinct Pathogenic Phenotypes and Clinical Outcomes

**Tables and Figures with legends:**

**Supplementary Table 1A:** Baseline demographics and clinical characteristics of the SMM patients in the primary cohort (n=214). Numerical Variables are described as medians and the range of values, while categorical variables are presented as numbers and percentages.

|                           | <b>Total</b>          |
|---------------------------|-----------------------|
|                           | n = 214 (%)           |
| <b>Age</b>                |                       |
| Median (range)            | 62 (34 - 85)          |
| <b>Sex</b>                |                       |
| Female                    | 115 (54)              |
| Male                      | 99 (46)               |
| <b>Race</b>               |                       |
| Black or African American | 10 (5)                |
| White                     | 204 (95)              |
| <b>BM % involvement</b>   |                       |
| Median (range)            | 0.250 (0.028 - 0.800) |
| <b>M-spike</b>            |                       |
| Median (range)            | 1.80 (0.00 - 5.17)    |
| <b>LDH</b>                |                       |
| Median (range)            | 174.5 (92.0 - 562.0)  |
| <i>Missing</i>            | <i>24 (11)</i>        |
| <b>β2M</b>                |                       |
| Median (range)            | 2.40 (0.80 - 9.10)    |
| <b>Mayo, 2008</b>         |                       |
| Low                       | 48 (22)               |
| Intermediate              | 136 (64)              |
| High                      | 30 (14)               |
| <b>20-2-20 Risk score</b> |                       |
| Low                       | 53(25)                |
| Intermediate              | 63(29)                |
| High                      | 98(46)                |

**Supplementary Table 1B:** Significant genetic features in the six identified clusters that were positively associated with each cluster in the primary cohort (n=214). The features were determined by a one-sided Fisher test and ranked by significance (Benjamini-Hochberg adjusted p value < 0.1).

| <b>Cluster</b> | <b>Genetic feature</b> | <b>P value</b> | <b>Adjusted P value</b> |
|----------------|------------------------|----------------|-------------------------|
| <b>HL1</b>     | NRAS                   | 3.23E-05       | 1.58E-03                |
|                | TRAF3                  | 8.11E-05       | 1.99E-03                |
|                | MAX                    | 1.27E-03       | 1.55E-02                |
|                | FAM46C                 | 8.40E-03       | 8.23E-02                |
| <b>HL2</b>     | 16q_del                | 6.26E-09       | 3.07E-07                |
|                | t(14;20)               | 6.60E-07       | 1.62E-05                |
|                | 6q_del                 | 1.87E-06       | 3.05E-05                |
|                | MAFB                   | 1.19E-05       | 1.46E-04                |
|                | BRAF                   | 3.12E-04       | 3.06E-03                |
|                | del_20q                | 7.52E-04       | 6.14E-03                |
|                | del_18q                | 1.27E-03       | 8.88E-03                |
|                | NRAS                   | 1.64E-03       | 1.00E-02                |
|                | DUSP2                  | 3.71E-03       | 1.82E-02                |
|                | 1p_del                 | 5.19E-03       | 2.12E-02                |
|                | 4q_del                 | 4.47E-03       | 1.99E-02                |
|                | TP53                   | 8.40E-03       | 2.74E-02                |
|                | ATM                    | 8.40E-03       | 2.74E-02                |
|                | NFKB2                  | 8.40E-03       | 2.74E-02                |
|                | 17p_del                | 1.46E-02       | 4.46E-02                |
| LTB            | 1.62E-02               | 4.67E-02       |                         |
| <b>HL3</b>     | KRAS                   | 6.38E-07       | 3.13E-05                |
|                | NFKBIA                 | 3.71E-03       | 6.06E-02                |
|                | MYC translocation      | 3.71E-03       | 6.06E-02                |
| <b>HL4</b>     | 2p_amp                 | 2.36E-06       | 1.16E-04                |
|                | NFKB2                  | 3.13E-04       | 7.67E-03                |

| Cluster | Genetic feature | P value  | Adjusted P value |
|---------|-----------------|----------|------------------|
| TL1     | t(14;16)        | 6.29E-08 | 2.87E-06         |
|         | t(4;14)         | 1.17E-07 | 2.87E-06         |
|         | 14q_del         | 1.87E-06 | 3.05E-05         |
|         | DIS3            | 1.10E-04 | 7.54E-04         |
|         | MAF             | 8.11E-05 | 7.54E-04         |
|         | 17p_del         | 1.39E-04 | 7.54E-04         |
|         | 12p_del         | 1.10E-04 | 7.54E-04         |
|         | 8p_del          | 1.33E-04 | 7.54E-04         |
|         | 10p_del         | 1.10E-04 | 7.54E-04         |
|         | HIST1H1E        | 9.01E-04 | 4.01E-03         |
|         | ZNF292          | 1.27E-03 | 4.78E-03         |
|         | SETD2           | 1.27E-03 | 4.78E-03         |
|         | PRKD2           | 3.71E-03 | 1.07E-02         |
|         | 22q_del         | 3.31E-03 | 1.07E-02         |
|         | 9q_amp          | 3.71E-03 | 1.07E-02         |
|         | ATM             | 8.40E-03 | 2.06E-02         |
|         | EGR1            | 8.40E-03 | 2.06E-02         |
| TL2     | t(11;14)        | 1.54E-19 | 7.55E-18         |
|         | 11q_amp         | 3.12E-04 | 7.65E-03         |

**Supplementary Table 2:** Baseline demographics and clinical characteristics of the 87 untreated SMM patients. These patients were followed for disease progression and their clinical stratification was according to the 20/2/20 clinical risk model. Variables in each group are described as medians with the range of values. Comparison between the different risk groups is done using Cuzick's trend test.

|                                        | 20-2-20 clinical model |                     |                             |                     | <i>p-value</i>       |
|----------------------------------------|------------------------|---------------------|-----------------------------|---------------------|----------------------|
|                                        | Total<br>n = 87 (%)    | Low<br>n = 23 (27)  | Intermediate<br>n = 22 (26) | High<br>n = 42 (55) |                      |
| <b>BM % involvement</b>                |                        |                     |                             |                     |                      |
| Median (range)                         | 0.30 (0.10 - 0.80)     | 0.15 (0.10 - 0.20)  | 0.20 (0.10 - 0.55)          | 0.40 (0.20 - 0.80)  | < 0.001 <sup>†</sup> |
| <b>M-spike</b>                         |                        |                     |                             |                     |                      |
| Median (range)                         | 1.69 (0.00 - 5.17)     | 1.18 (0.00 - 1.87)  | 1.34 (0.00 - 2.30)          | 2.16 (0.00 - 5.17)  | < 0.001 <sup>†</sup> |
| <b>FLCr, Involved/uninvolved ratio</b> |                        |                     |                             |                     |                      |
| Median (range)                         | 19.3 (1.1 - 325.3)     | 2.9 (1.1 - 15.7)    | 11.1 (1.6 - 255.9)          | 48.6 (2.3 - 325.3)  | < 0.001 <sup>†</sup> |
| <b>β2M</b>                             |                        |                     |                             |                     |                      |
| Median (range)                         | 2.50 (1.40 - 6.40)     | 2.50 (1.50 - 6.40)  | 2.35 (1.50 - 3.80)          | 2.50 (1.40 - 5.90)  | 0.95 <sup>†</sup>    |
| <b>Hemoglobin</b>                      |                        |                     |                             |                     |                      |
| Median (range)                         | 12.6 (8.3 - 16.2)      | 12.7 (8.3 - 15.4)   | 13.2 (11.0 - 16.2)          | 12.4 (10.3 - 15.2)  | 0.14 <sup>†</sup>    |
| <b>LDH</b>                             |                        |                     |                             |                     |                      |
| Median (range)                         | 156 (92 - 422)         | 147 (92 - 422)      | 172 (120 - 262)             | 160 (104 - 364)     | 0.21 <sup>†</sup>    |
| <i>Missing</i>                         | 15 (18)                | 6 (26)              | 7 (32)                      | 2 (5)               |                      |
| <b>Calcium</b>                         |                        |                     |                             |                     |                      |
| Median (range)                         | 9.60 (8.70 - 10.50)    | 9.60 (8.70 - 10.50) | 9.45 (8.80 - 10.00)         | 9.60 (9.00 - 10.10) | 0.82 <sup>†</sup>    |
| <b>Creatinine</b>                      |                        |                     |                             |                     |                      |
| Median (range)                         | 0.90 (0.60 - 1.60)     | 0.90 (0.69 - 1.40)  | 0.99 (0.60 - 1.60)          | 0.90 (0.60 - 1.40)  | 0.12 <sup>†</sup>    |
| <i>Missing</i>                         | 1 (1)                  | -                   | 1 (5)                       | -                   |                      |
| <b>Total protein</b>                   |                        |                     |                             |                     |                      |
| Median (range)                         | 8.1 (5.5 - 11.0)       | 7.7 (6.8 - 8.4)     | 7.8 (5.5 - 8.8)             | 8.6 (5.5 - 11.0)    | < 0.001 <sup>†</sup> |
| <b>Albumin</b>                         |                        |                     |                             |                     |                      |
| Median (range)                         | 4.1 (2.9 - 5.0)        | 4.2 (3.5 - 5.0)     | 4.2 (3.5 - 4.8)             | 4.0 (2.9 - 4.8)     | 0.10 <sup>†</sup>    |
| <i>Missing</i>                         | 1 (1)                  | 1 (4)               | -                           | -                   |                      |
| <b>Globulin</b>                        |                        |                     |                             |                     |                      |
| Median (range)                         | 3.8 (0.3 - 7.8)        | 3.7 (2.2 - 4.6)     | 3.5 (2.0 - 4.6)             | 4.2 (0.3 - 7.8)     | 0.003 <sup>†</sup>   |
| <i>Missing</i>                         | 1 (1)                  | 1 (4)               | -                           | -                   |                      |
| <b>Albumin/Globulin ratio</b>          |                        |                     |                             |                     |                      |
| Median (range)                         | 1.1 (0.4 - 13.0)       | 1.1 (0.8 - 2.3)     | 1.2 (0.9 - 1.8)             | 0.9 (0.4 - 13.0)    | 0.005 <sup>†</sup>   |
| <i>Missing</i>                         | 1 (1)                  | 1 (4)               | -                           | -                   |                      |

**Supplementary Table 3:** List of genetic alterations that were significantly enriched in High-risk genetic subgroups (HL2, TL1, HL3) in the primary cohort (n=214). The features were determined by a two-sided Fisher test and ranked by significance (Benjamini-Hochberg adjusted p value < 0.1).

| Genetic alteration | P value              | Adjusted P value       |
|--------------------|----------------------|------------------------|
| 16q_del            | 3.92133701244461E-19 | 1.88224176597341E-17   |
| 6q_del             | 1.30661737533785E-16 | 3.13588170081083E-15   |
| del_22q            | 3.46052641707861E-15 | 5.53684226732578E-14   |
| del_20q            | 9.81983940020603E-14 | 1.17838072802472E-12   |
| KRAS               | 5.74309437412292E-12 | 5.09021145715801E-11   |
| 1p_del             | 6.36276432144751E-12 | 5.09021145715801E-11   |
| del_8p             | 1.076934966262E-11   | 7.38469691151089E-11   |
| 17p_del            | 2.66210661752379E-10 | 1.59726397051427E-09   |
| t(4;14)            | 9.59521520668869E-10 | 5.11744811023397E-09   |
| 14q_del            | 7.16829126182379E-09 | 3.44077980567542E-08   |
| del_4q             | 1.03923060318069E-08 | 4.534824450243E-08     |
| ATM                | 6.28534662885084E-08 | 2.32074337065262E-07   |
| t(14;16)           | 6.28534662885084E-08 | 2.32074337065262E-07   |
| DIS3               | 7.72727909076587E-08 | 2.64935283111973E-07   |
| BRAF               | 5.07514260624449E-07 | 1.52254278187335E-06   |
| LTB                | 6.5996139602957E-07  | 1.6672708952326E-06    |
| HIST1H1E           | 6.5996139602957E-07  | 1.6672708952326E-06    |
| t(14;20)           | 6.5996139602957E-07  | 1.6672708952326E-06    |
| NFKBIA             | 7.64717173177041E-07 | 1.8353212156249E-06    |
| del_10p            | 3.75087303233623E-06 | 8.18372297964268E-06   |
| TP53               | 6.63104069343861E-06 | 1.32620813868772E-05   |
| ZNF292             | 1.19077388394712E-05 | 1.97093608377455E-05   |
| MAFB               | 1.19077388394712E-05 | 1.97093608377455E-05   |
| 1q_gain            | 3.91221254141483E-05 | 6.25954006626372E-05   |
| FAM46C             | 4.98897812477866E-05 | 7.72486935449599E-05   |
| MAF                | 8.10600203567709E-05 | 0.00011116802791785700 |

**Supplementary Table 4:** Performance of the Clinical Models only and with adding the Genetic Model (based on the genetic risk groups). Improvement in goodness of fit was assessed with a likelihood ratio test. The genetic model significantly improved the fit of the clinical-only models. A global assessment of each model was also assessed using a C-statistic for censored survival data. The statistic for each time-to-event model is reported with a 95% CI. Values range from 0.5 to 1, which indicates a poor to perfect model.

| <b>Cohort</b>                                | <b>Model</b>       | <b>Likelihood Ratio Test Statistic</b> | <b><math>\chi^2</math> P</b> | <b>Model C-statistic (95% CI)</b> | <b>AIC/BIC</b> |
|----------------------------------------------|--------------------|----------------------------------------|------------------------------|-----------------------------------|----------------|
| Primary<br>(DFCI, UCL, Greece)<br>(n=87)     | Clinical           | 14.7                                   | < 0.001                      | 0.71 (0.64 - 0.78)                | 406/411        |
|                                              | Clinical + Genetic |                                        |                              | 0.76 (0.68 - 0.83)                | 396/404        |
|                                              |                    |                                        |                              |                                   |                |
| Validation<br>(UAMS)<br>(n=75)               | Clinical           | 12.1                                   | 0.002                        | 0.65 (0.49 - 0.80)                | 165/168        |
|                                              | Clinical + Genetic |                                        |                              | 0.76 (0.62 - 0.90)                | 157/162        |
|                                              |                    |                                        |                              |                                   |                |
| Validation<br>(UAMS, Mayo)<br>(n=142)        | Clinical           | 13.53                                  | 0.001                        | 0.66 (0.59 - 0.74)                | 567/571        |
|                                              | Clinical + Genetic |                                        |                              | 0.71 (0.64 - 0.78)                | 560/569        |
|                                              |                    |                                        |                              |                                   |                |
| Combined<br>(Primary, UAMS, Mayo)<br>(n=229) | Clinical           | 29.84                                  | < 0.001                      | 0.69 (0.64 - 0.73)                | 1146/1151      |
|                                              | Clinical + Genetic |                                        |                              | 0.74 (0.69 - 0.78)                | 1123/1135      |



**Supplementary Table 5:** Univariate Cox PFS regression of the high-risk genetic features in the primary cohort (n = 87). Number of patients with event and percentages from the total number of patients evaluable, HR hazards ratio, error bars indicate 95% CI. All p values are two-sided. Naïve and corrected p-values are presented. Multiple testing correction was done by Benjamini-Hochberg method with p value < 0.1.

|                 |                     | Estimates |              | p-value |           |
|-----------------|---------------------|-----------|--------------|---------|-----------|
| Variable        | No. of patients (%) | HR        | 95% CI       | naive   | corrected |
| MYC alterations | 7 (9)               | 7.58      | 3.02 - 19.03 | < 0.001 | < 0.001   |
| KRAS            | 12 (14)             | 4.13      | 2.10 - 8.12  | < 0.001 | < 0.001   |
| del(1p)         | 7 (8)               | 4.24      | 1.89 - 9.51  | < 0.001 | 0.003     |
| del(14q)        | 10 (12)             | 3.06      | 1.47 - 6.34  | 0.003   | 0.010     |
| del(8p)         | 8 (9)               | 3.43      | 1.53 - 7.70  | 0.003   | 0.010     |
| TP53            | 5 (6)               | 3.89      | 1.50 - 10.10 | 0.005   | 0.017     |
| NRAS            | 5 (6)               | 3.23      | 1.27 - 8.21  | 0.014   | 0.035     |
| del(6q)         | 11 (13)             | 2.46      | 1.18 - 5.11  | 0.016   | 0.035     |
| del(22q)        | 7 (8)               | 2.97      | 1.24 - 7.09  | 0.014   | 0.035     |
| t(4;14)         | 5 (6)               | 2.69      | 1.05 - 6.89  | 0.039   | 0.072     |
| del(16q)        | 18 (21)             | 1.66      | 0.89 - 3.08  | 0.11    | 0.06      |
| del(4q)         | 5 (6)               | 1.69      | 0.61 - 4.69  | 0.32    | 0.41      |
| del(13q)        | 42 (49)             | 1.26      | 0.73 - 2.17  | 0.41    | 0.50      |
| gain(1q)        | 21 (25)             | 1.6       | 0.90 - 2.83  | 0.47    | 0.12      |

**Supplementary Table 6:** Univariate Cox PFS regression of the high-risk genetic features in the combined cohorts (n = 229). Number of patients with event and percentages from the total number of patients evaluable, HR hazards ratio, error bars indicate 95% CI. All p values are two-sided. Naïve and corrected p-values are presented. Multiple testing correction was done by Benjamini-Hochberg method with p value < 0.1.

|                  |                     | Estimates       | p-value  |           |
|------------------|---------------------|-----------------|----------|-----------|
| Variable         | No. of patients (%) | HR (95% CI)     | naive    | corrected |
| MYC aberrations  | 48 (21)             | 1.9 (1.2-2.8)   | 0.0022   | 0.0055    |
| KRAS             | 43 (19)             | 2.7 (1.9-4)     | 3.50E-07 | <0.0001   |
| gain_1q          | 60 (26)             | 1.5 (1-2.1)     | 0.047    | 0.0588    |
| del_16q          | 38 (17)             | 1.4 (0.91-2.2)  | 0.12     | 0.1385    |
| del_1p           | 24 (11)             | 2 (1.3-3.3)     | 0.0027   | 0.0058    |
| del_8p           | 20 (9)              | 3.2 (1.9-5.4)   | 1.10E-05 | 0.0001    |
| del_6q           | 29 (13)             | 2.6 (1.7-4.1)   | 2.10E-05 | 0.0001    |
| t.4.14.          | 16 (7)              | 2.6 (1.5-4.6)   | 0.00082  | 0.0025    |
| TP53_aberrations | 14 (6)              | 2.6 (1.4-4.8)   | 0.0035   | 0.0066    |
| DIS3             | 13 (6)              | 2.3 (1.2-4.3)   | 0.0082   | 0.0123    |
| FAM46C           | 9 (4)               | 2.7 (1.3-5.7)   | 0.0067   | 0.0112    |
| del_22q          | 22 (10)             | 1.7 (1-2.9)     | 0.039    | 0.0532    |
| del_14q          | 23 (10)             | 2.6 (1.6-4.3)   | 0.00011  | 0.0004    |
| t.14.16.         | 6 (3)               | 0.98 (0.35-2.7) | 0.97     | 0.9700    |
| ATM              | 6 (3)               | 2.1 (0.75-5.6)  | 0.16     | 0.1714    |

**Supplementary Figure 1:** Outline and results of the binary matrix factorization and consensus clustering. A) Age and sex distribution of primary cohort (n=214). B) Logistic principal components analysis (PCA) projection of binarized dataset (n=214). Green color denotes the presence of the variable of interest while red color indicates the rest of the dataset. C) Sample-sample consensus matrix of binary matrix factorization results (K=2-10) with translocations and copy number (left). D) LogisticPCA colored by subtypes. Mutational signature abundance per molecular subtype for E) Aging , F) APOBEC, and G) AID signatures. H) APOBEC mutational signature abundance in HL2/TL1 vs the other clusters. Two-sided p-value was calculated using the Wilcoxon rank-sum test. Boxplots representing median, and interquartile range, whiskers representing first, and fourth quartile

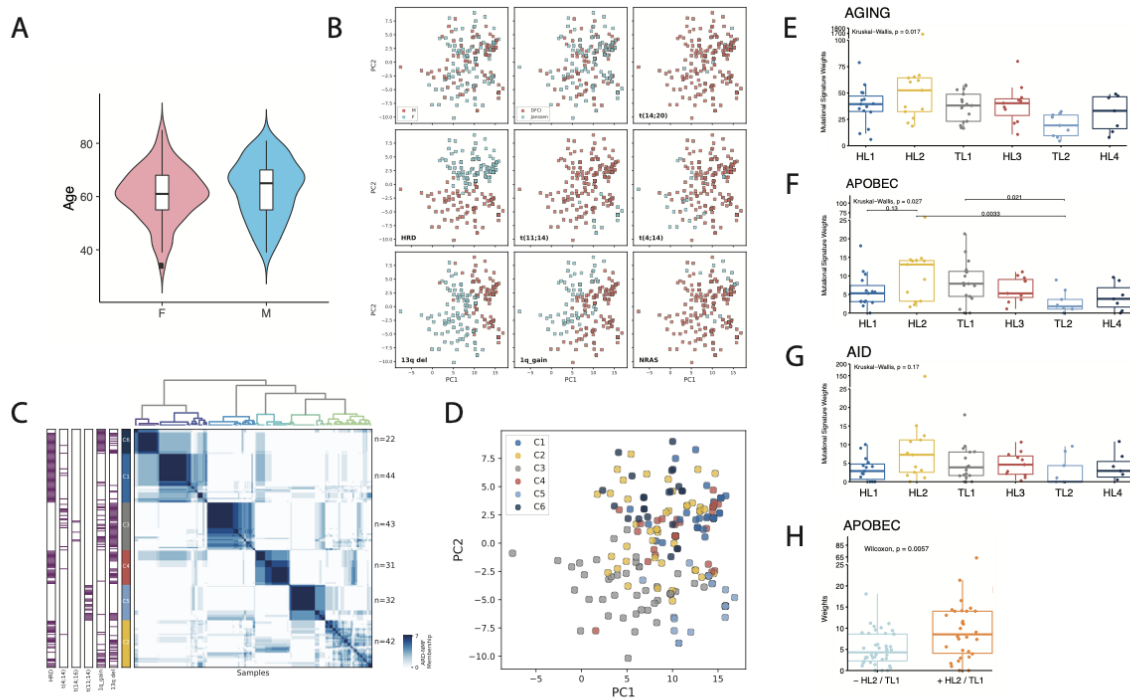

**Supplementary Figure 2:** Additional gene expression (log TPM + 1) comparisons (n=89). A) *CCND1* gene in TL2 tumors vs. the other tumors; B) *CCND2* gene in TL1 & HL2 tumors vs. the rest. C) *CCND2* expression in HL1-4 (Hyperdiploid) subtypes with and without 11q gain. D) *CCND1* expression in HL1-4 subtypes with and without 11q gain. Two-sided p-value was calculated using the Wilcoxon rank-sum test. Expression is measured by the log<sub>2</sub> value of transcript per million of each gene (log<sub>2</sub> TPM + 1). Boxplots representing median, and interquartile range, whiskers representing first, and fourth quartile. Two-sided p-value was calculated using the Wilcoxon rank-sum test.

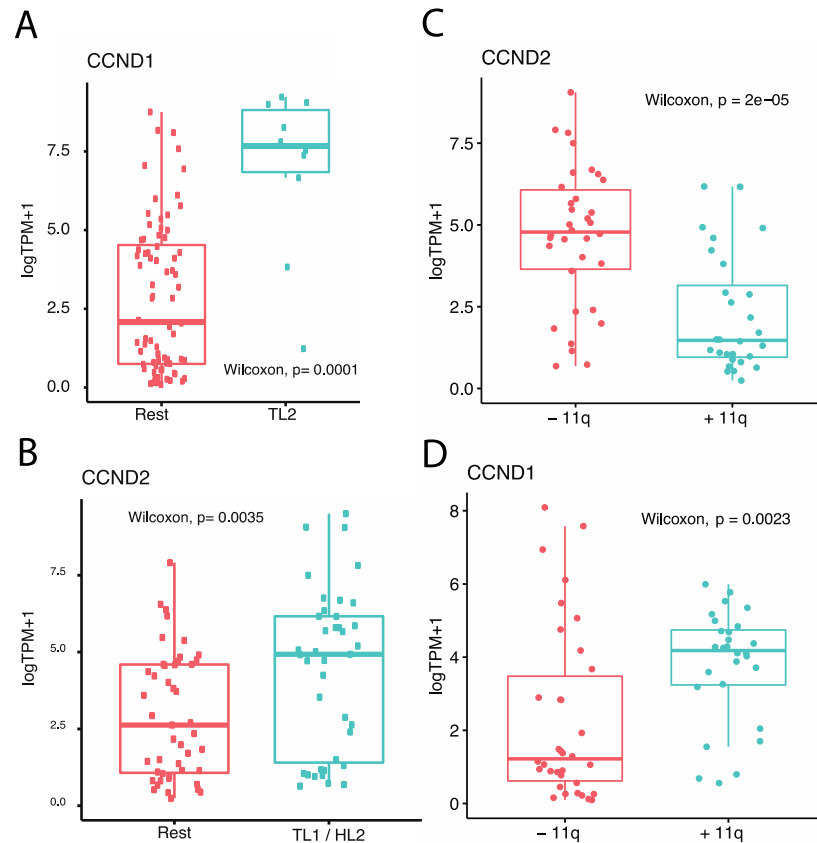

**Supplementary Figure 3:**

**A)** Kaplan-Meier curves for analysis of TTP according to the six genetic subtypes from the primary cohort. **B)** Cox proportional hazards analysis of the six genetic subtypes and in the primary cohort. **C)** Kaplan-Meier curves for analysis of TTP in patients from the primary cohort belonging to high vs intermediate and low-risk genetic subtypes in the clinically high-risk group by the 20-2-20 model. All p values are two-sided. Differences in survival curves and subsequent two-sided p values were calculated using the log-rank test. Forest plots are used to visualize the multivariate analysis. N: number of patients with event and percentages from the total number of patients evaluable, HR hazards ratio, error bars indicate 95% CI.

**A)**

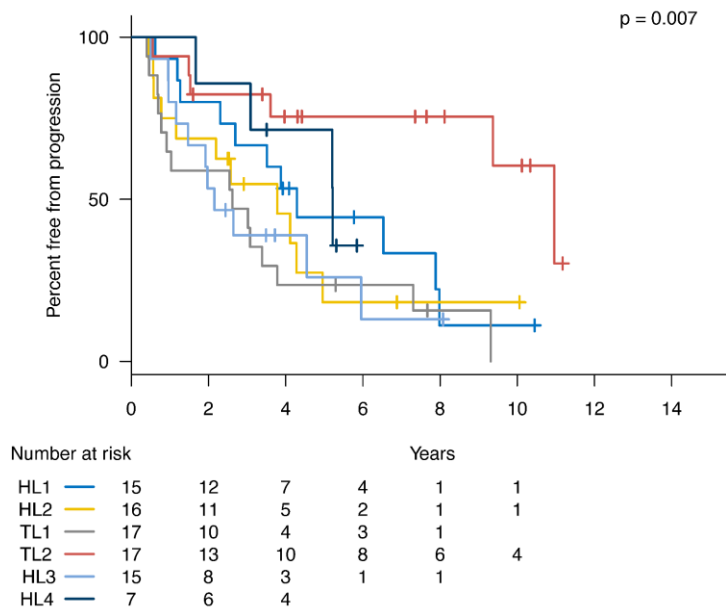

**B)**

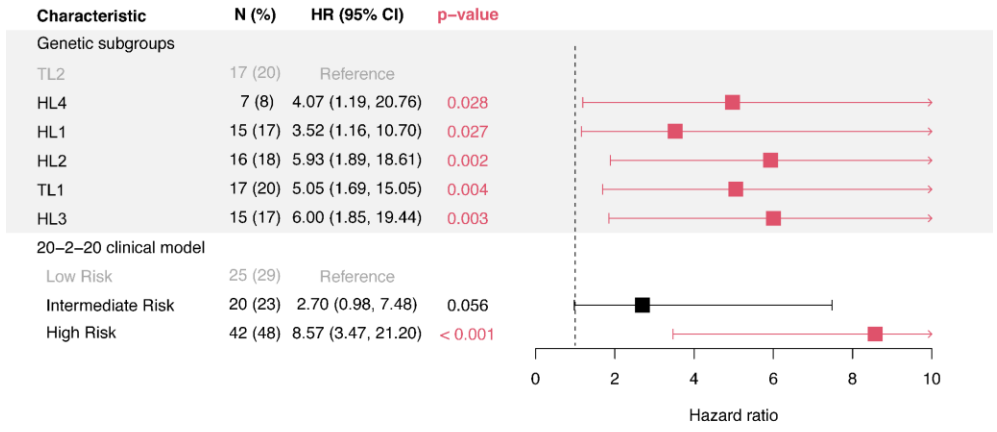

**c)**

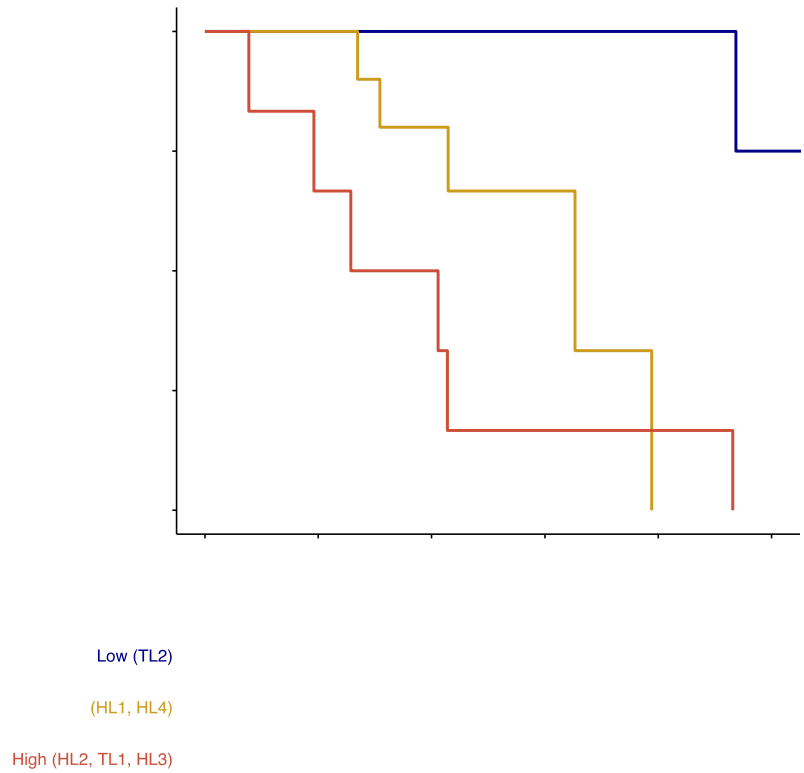

**Supplementary Figure 4: A)** Random Forest K-fold cross validation accuracy over 10 repeats with mean accuracy and standard deviation reported. **B)** Grid search to optimize parameters did not improve over initial random forest parameters. **C)** The prevalence of each feature in the dataset plotted by feature importance in classifying genetic subtypes.

**A**

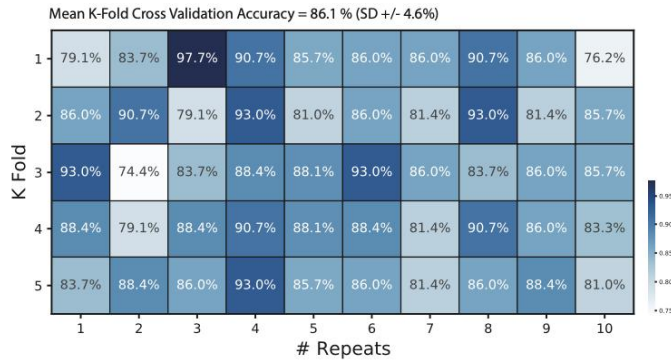

**B**

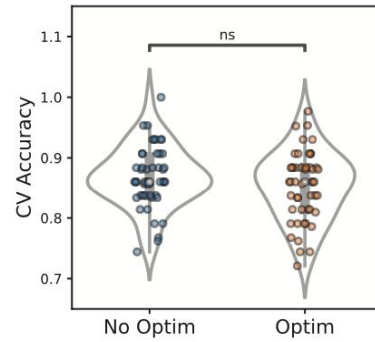

**C**

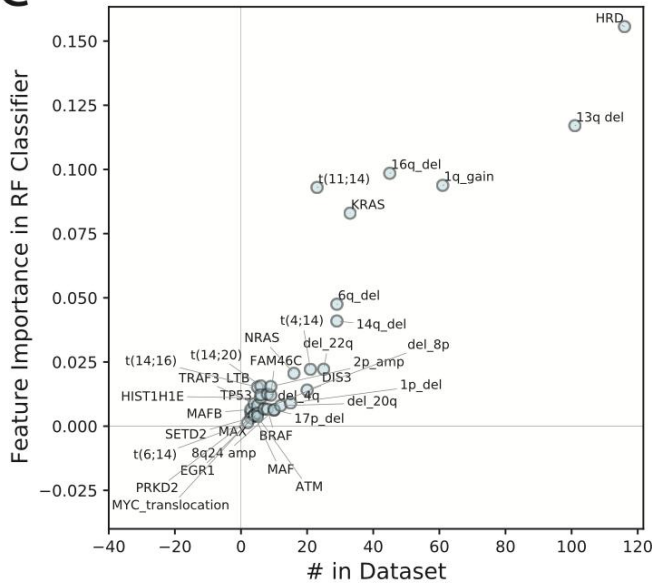

**Supplementary Figure 5:** Kaplan-Meier curves for analysis of TTP in the combined cohort (n=229) belonging to high vs intermediate and low-risk genetic subtypes in the clinically high(A) and intermediate(B) groups by the 20-2-20 model in the combined cohort. All p values are two-sided. Differences in survival curves and subsequent two-sided p values were calculated using the log-rank test.

**A)**

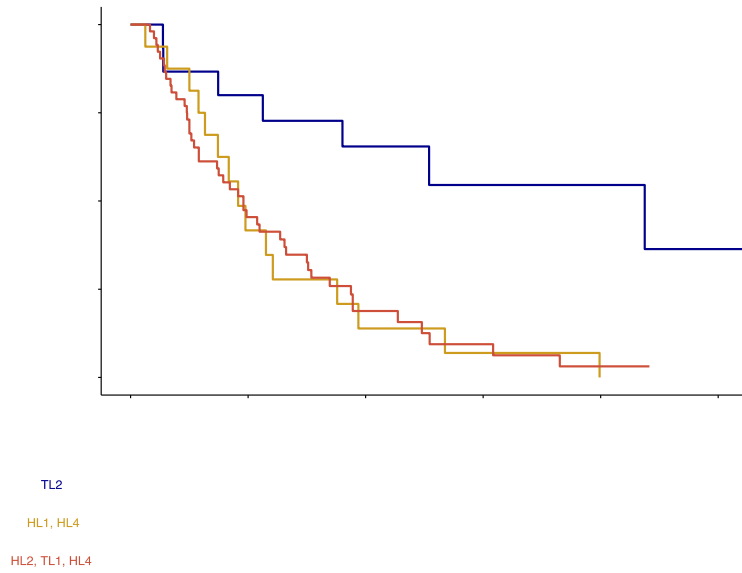

**B)**

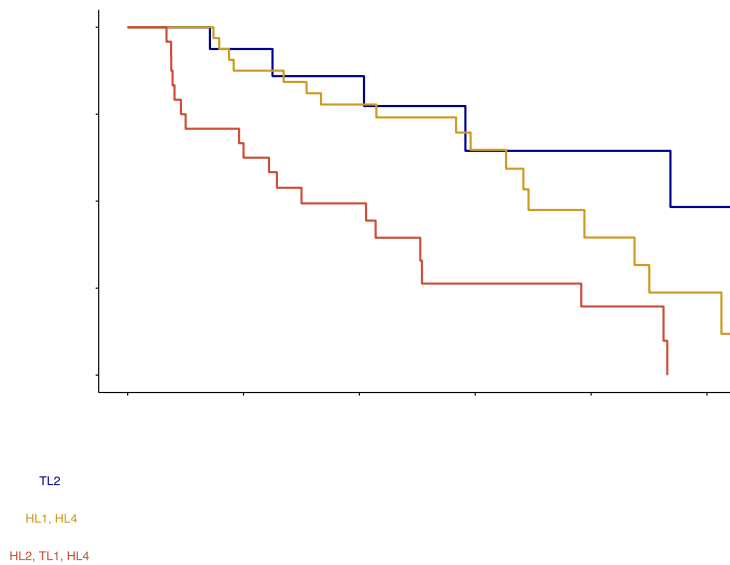



**Supplementary Figure 6: RNA-SeQC quality control metrics for NGS RNA samples** A) general metrics with filtered samples (n=13) for a cutoff of 0.8 median exon CV. B) PCA of filtered transcriptome colored by 3' Strand Bias C) Median Exon CV

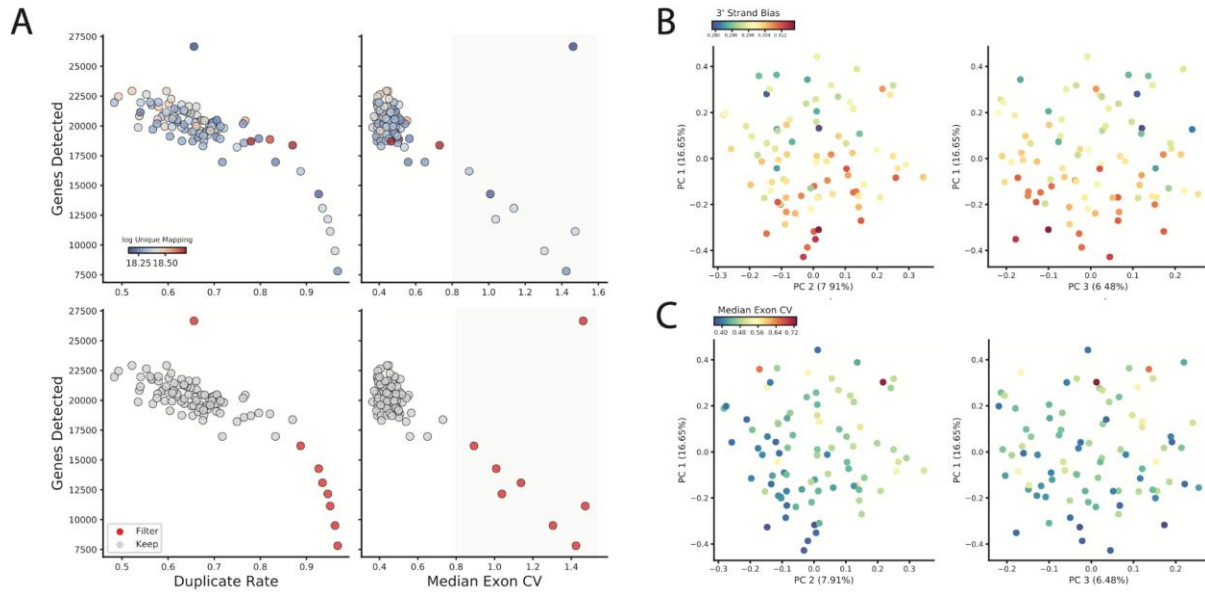

**Supplementary Figure 7: Down sampling analysis of dataset for binary matrix factorization; A-D) random down-sample runs (n=100) for a range of sample sizes (n=25-214) showing explained variance (A) K-L divergence (B) Residuals (C) and Silhouette Score (D); E) Heatmap of mean scores for each down-sample run.**

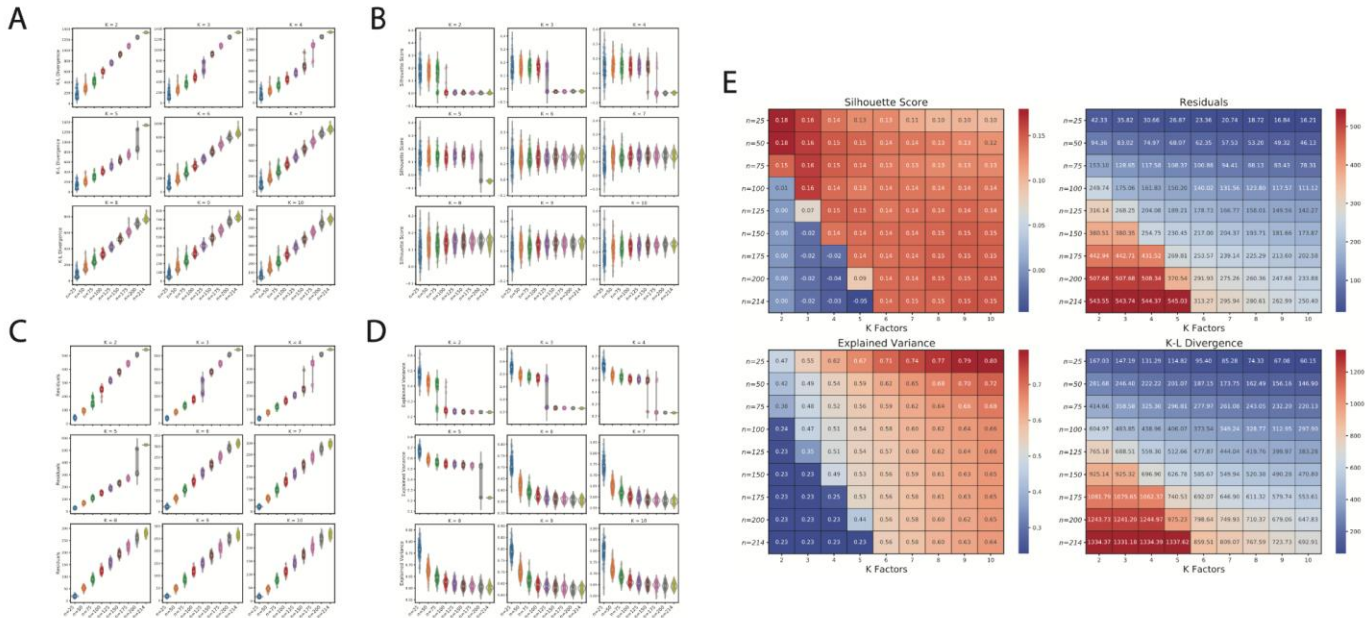

Supplement: 41467_2022_30694_MOESM1_ESM.pdf [file 41467_2022_30694_MOESM1_ESM.pdf]
